# Supplementary material for: Specific Resistance of Barley to Powdery Mildew, Its Use and Beyond: A Concise Critical Review
Source: Genes (Basel). 2020 Aug 21;11(9):971. doi: 10.3390/genes11090971 (PMC7565388; doi:10.3390/genes11090971)
Supplement: Supplementary file 1 [file genes-11-00971-s001.pdf]

**Supplementary Table S1.** Response types developed on leaves of barley after inoculation with an isolate of *Blumeria graminis* f. sp. *hordei*

| <b>Response type</b> | <b>Mycelium growth</b> | <b>Sporulation</b> |
|----------------------|------------------------|--------------------|
| 0                    | None                   | None               |
| 0–1                  | None                   | None               |
| 1                    | Weak                   | None               |
| 1–2                  | Weak                   | Weak               |
| 2                    | Moderate               | Weak               |
| 2–3                  | Moderate               | Moderate           |
| 3                    | Strong                 | Moderate           |
| 3–4                  | Strong                 | Strong             |
| 4                    | Strong                 | Strong             |

[45] Modified.
